# Supplementary material for: Pair aligning improved motility of Quincke rollers
Source: Royal Society of Chemistry journal article supplement (doi:10.1039/c8sm00371h), 2018-01-01
Supplement: c8sm00371h4.pdf [file c8sm00371h4.pdf]

## Supplementary Information

### Pair Aligning Improved Motility of Quincke Rollers

Shi Qing Lu,<sup>a,b</sup> Bing Yue Zhang,<sup>a,b</sup> Zhi Chao Zhang,<sup>a,b</sup> Yan Shi<sup>a,b</sup> and Tian Hui Zhang<sup>\*a,b</sup>

<sup>a</sup>. Center for Soft Condensed Matter Physics and Interdisciplinary Research, Soochow University, Suzhou, 215006, P. R. China

<sup>b</sup>. College of Physics, Optoelectronics and Energy, Soochow University, Suzhou, 215006, P. R. China

**Movie 1A:** Transient dynamic cluster.  $E/E_c = 1.10$ ,  $\phi = 0.03$ , acquisition rate 500 fps, video frame rate 20 fps.

**Movie 1B:** Dynamic evolution of velocity in Movie 1A

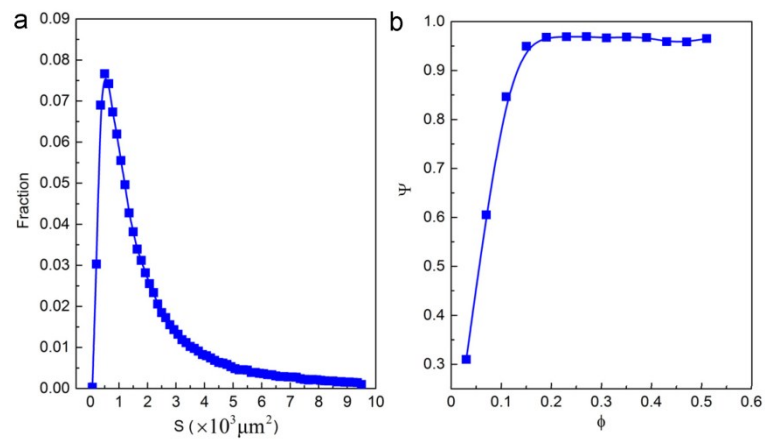

Figure S1. a. Distribution of  $S_{\text{vor}}$ . b. Polar order as the function of local area fraction
